# Supplementary material
Source: PubMed Central journal article supplement (PMC3981934)
Supplement: NIHMS549969-supplement-2.pdf [file NIHMS549969-supplement-2.pdf]

Supplementary Table 1. Taqman probes and primers for droplet digital PCR

| Gene   | VIC probe*                        | 6-FAM probe*                          | Forward primer        | Reverse primer          |
|--------|-----------------------------------|---------------------------------------|-----------------------|-------------------------|
| MMP8   | TCCTCCAATACCTTGGCCTGGC            | TCCTCCAATATCTTGGCCTGGC                | CATGTTTCTTCGGCATCAA   | TCACGGTGACAATTCTCCAT    |
| SIN3A  | CCTCCACATCT <b>G</b> AGAGATCACC   | CCTCCACATCTTAGAGATCACC                | CCTGTGGCTTCATCTACATCC | TCATGCATCATTTTATTCCAGA  |
| TCF4   | CCTAGTAATTGATTTGATATCCTTCTTG      | CCTAGTA <b>A</b> GTGATTTGATATCCTTCTTG | AGGAATTAATGAAGCGACAGT | CGAAATCTTCGGAGGACAAG    |
| PCDHA9 | CGGTGTCTA <b>G</b> CCTGTTGGTTCTCA | CGGTGTCTATCCTGTTGGTTCTCA              | GAGGTGACGCTGGTGGAT    | GCACCGCAGCACAGTGTA      |
| DNALI1 | AGGGCAGCTGCTG <b>G</b> GTTGCTACT  | AGGGCAGCTGCTGTGTTGCTACT               | CATGGTGACGGCAAACAAG   | GGGTGTCGTACTIONTGGCAAAG |
| ZP1    | GAGAACT <b>G</b> GCTGGTGTCTGG     | GAGAACT <b>T</b> GCTGGTGTCTGG         | CTGGCGACCAGCTCATCTAT  | CCCTTACTGGAAGGTGCTGT    |
| HERC2  | TCCTGGTGGGAGAG <b>C</b> AGCGC     | TCCTGGTGGGAGAA <b>A</b> CAGCGC        | ACAGCTGGCTGAGACAGGAT  | GACAAGTGGACCTGGACCTG    |
| ZNF335 | CCTCACCGCT <b>G</b> CCCGCAGA      | CCTCACCGCTTCCCGCAGA                   | GTGGCTCAGGTTAGCTCCAC  | TGCTGACTCACACAAAGGAGA   |
| KBTBD5 | CAAATGGGGT <b>G</b> AATCGGACCC    | CAAATGGGGT <b>T</b> AATCGGACCC        | CCGTCTCCTCCAGGTCATT   | GCCGCCAATTACGTAGACA     |
| CDK9   | CAGACTTTGGGCTGGCCCGG              | CAGACTTTGGG <b>C</b> GGCCCGG          | GATCCTGCATAGGGACATGAA | GTTCTTGGCCAGGCTGAA      |
| PLSCR1 | TGGGGCCAGG <b>G</b> TAGCCACTATAT  | TGGGGCCAGG <b>T</b> TAGCCACTATAT      | GTGGGGGTGGGTAGCTGA    | CCATTTTTGGTGCAGTTACAAA  |

\*VIC conjugated probes are used to detect normal genotypes and 6-FAM conjugated probes are for variant genotypes. The variant and the corresponding normal nucleotides are marked in bold in the TaqMan probes.

Supplementary Table 2. Summary of capture efficiency

|                                     | Leukemia | Remission |
|-------------------------------------|----------|-----------|
| Total high quality reads obtained   | 88807512 | 79716978  |
| Unique reads                        | 76448344 | 72261339  |
| % reads mapped to one site in hg 19 | 95.80%   | 95.90%    |
| % of >10x covered target bases      | 94.40%   | 93.90%    |

Table 3. Summary of genomic variations

|                                         | Leukemia/Remission |
|-----------------------------------------|--------------------|
| Total SNV                               | 97926              |
| Called Somatic SNV                      | 22326              |
| Novel Somatic SNV                       | 4580               |
| SNV in genic regions                    | 2123               |
| SNV in coding regions                   | 1956 (95.3%)       |
| Synonymous mutation                     | 484 (24.7%)        |
| Non-synonymous mutation                 | 1470 (75.2%)       |
| Predicted as damaging mutation by SIFT  | 704 (36.0%)        |
| Predicted as tolerated mutation by SIFT | 1230 (62.9%)       |
