# Supplementary material
Source: PubMed Central journal article supplement (PMC3981934)

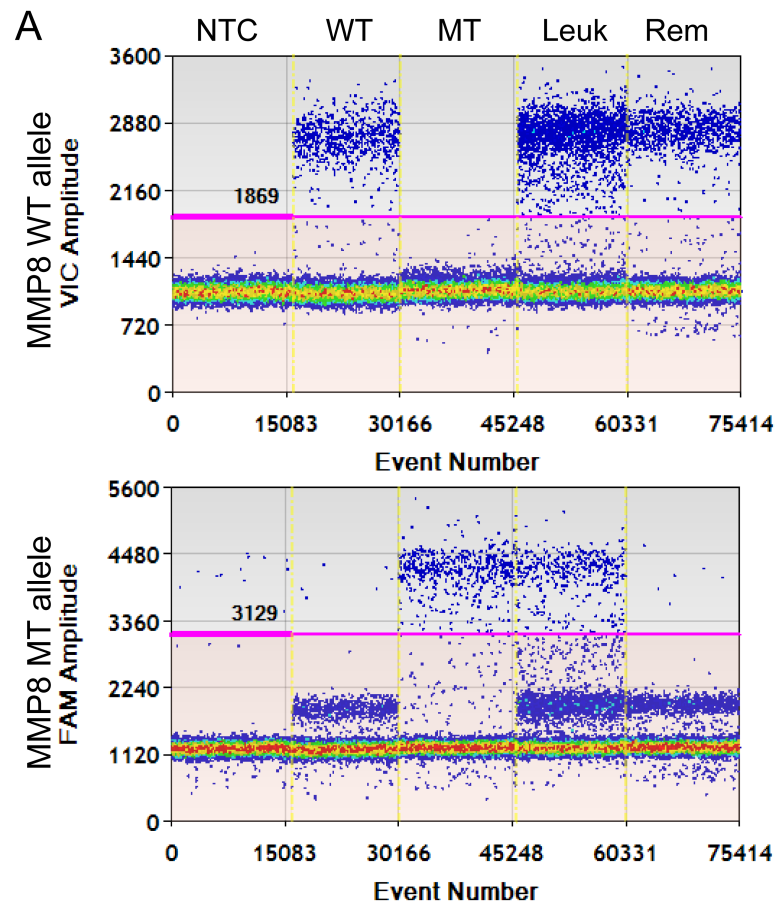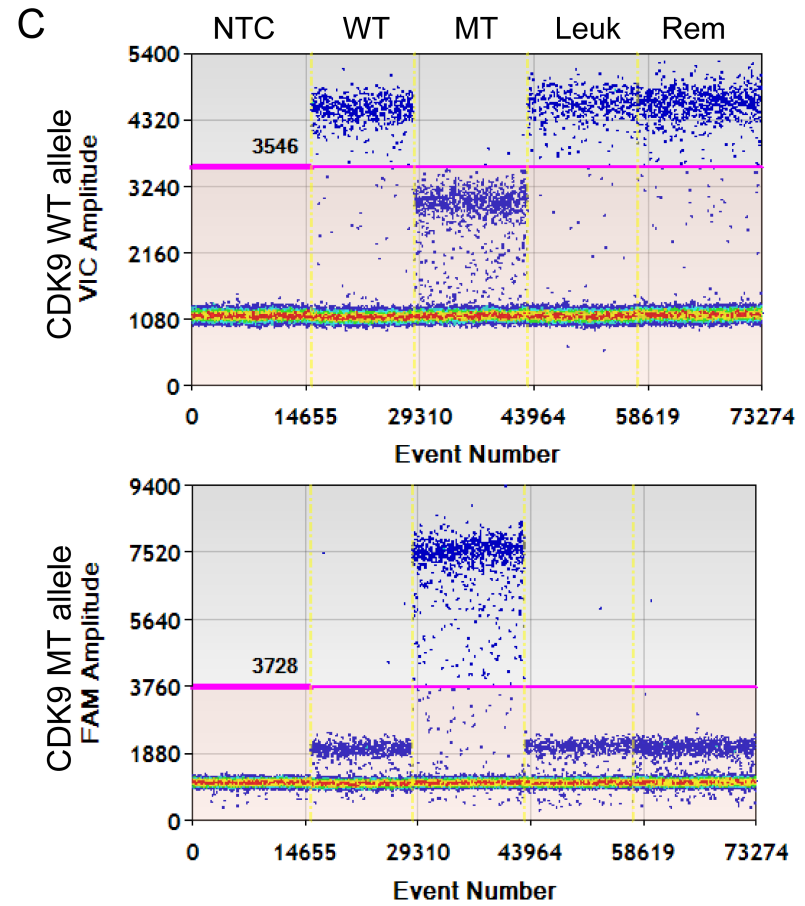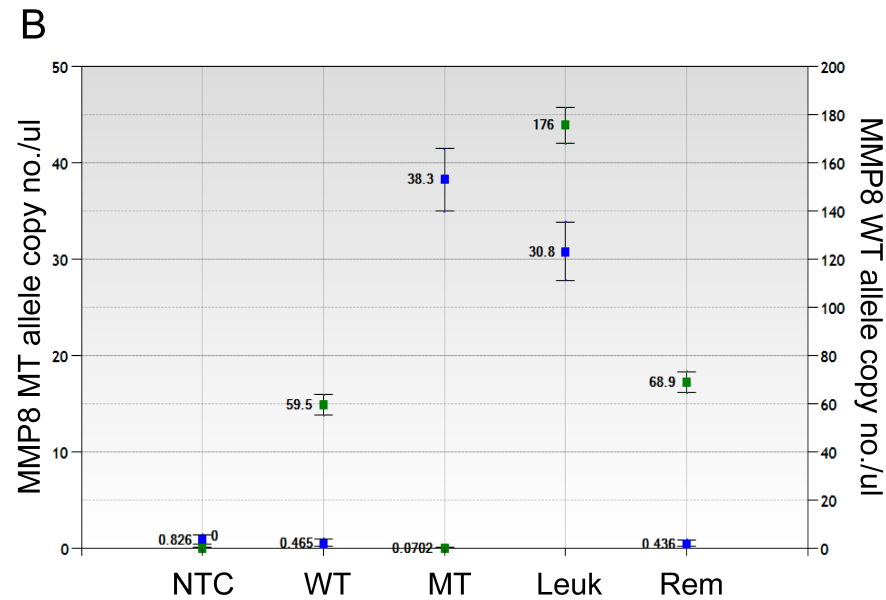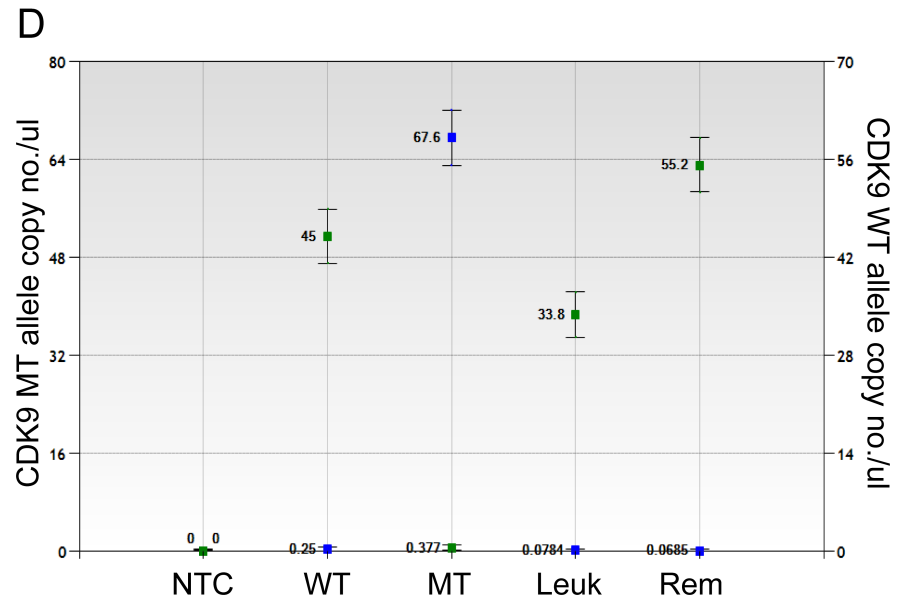

Supplementary Figure 1

Supplement: NIHMS549969-supplement-3.pdf [file NIHMS549969-supplement-3.pdf]
